# Supplementary material for: Distinct DNA conformations during forward and backward translocations through a conical nanopore
Source: Royal Society of Chemistry journal article supplement (doi:10.1039/d4an01068j), 2024-01-01
Supplement: d4an01068j1.pdf [file d4an01068j1.pdf]

## Supplementary Materials

# **Distinct DNA Conformations during Forward and Backward Translocations through a Conical Nanopore**

Fei Zheng<sup>1\*</sup>, Quan Han<sup>2</sup>

*1. Cavendish Laboratory, University of Cambridge, CB3 0HE, Cambridge, United Kingdom*

*2. School of Mechanical Engineering, Nanjing Forest University, 211100, Nanjing, China*

\*Correspondence to: Fei Zheng, E-mail: [fz284@cam.ac.uk](mailto:fz284@cam.ac.uk);

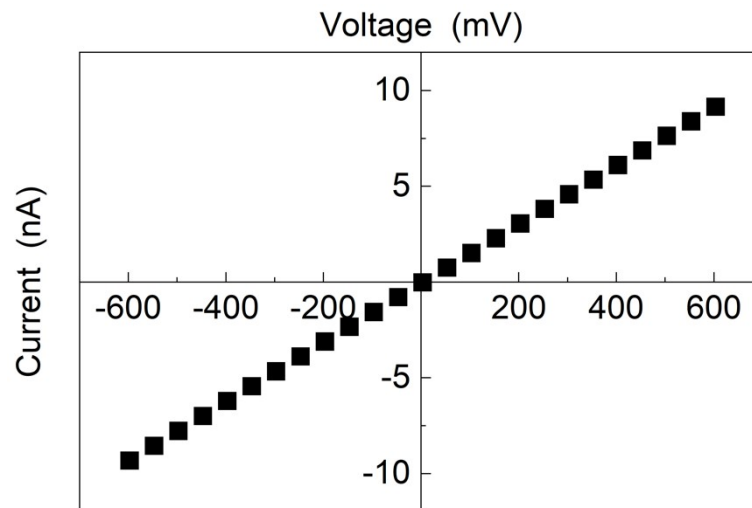

**Figure S1.** I-V curve measurement for the nanopore used in experiments. Prior to sample measurements, we scanned the current-voltage characteristic of nanopores from -600 mV to 600 mV to determine the pore diameter.

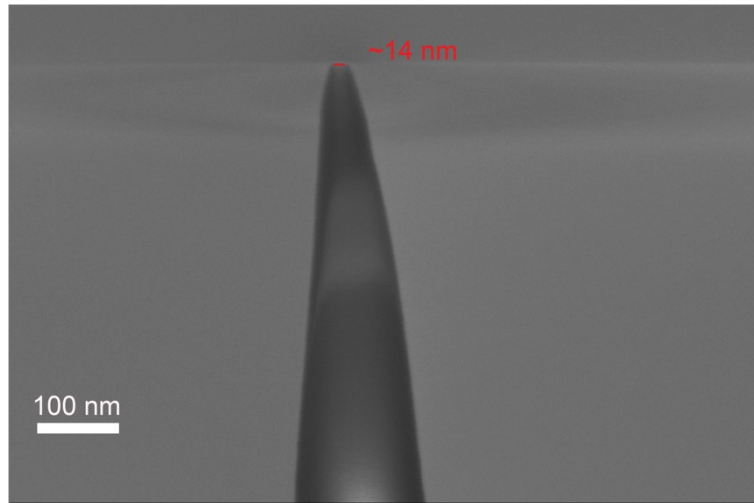

**Figure S2.** SEM characterization of the nanopore size. After subtracting the thickness of the nanopore wall, we obtain a nanopore diameter of approximately 14 nm.

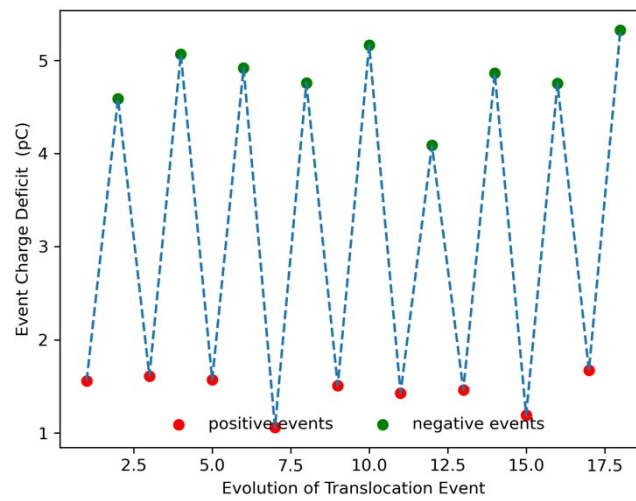

**Figure S3.** Event charge deficit (ECD) evolution during ping-pong process. The sample was lambda DNA. We show ECD value as a function of translocation event index during the ping-pong process. ECD values almost were the same for both forward translocation events and backward ones, indicating that these events were full translocation.

**Table S1.** Values of current blockade levels in the all-current point histograms for the forward and backward translocations.

| Current blockade level | Forward translocation | Backward translocation |
|------------------------|-----------------------|------------------------|
| 1                      | -0.16 nA              | -0.10 nA               |
| 2                      | -0.31 nA              | -0.20 nA               |
| 3                      |                       | -0.31 nA               |
| 4                      |                       | -0.42 nA               |
